# Supplementary material for: Convolutional Neural Network Techniques for Brain Tumor Classification (from 2015 to 2021): Review, Challenges, and Future Perspectives
Source: Preprints.org preprint supplement (doi:10.20944/preprints202206.0167.v1), 2022-06-13
Supplement: Supplementary file 1 [file Articles screening recording.xlsx]

## Sheet: Article Screening Recording
	Articles				Exclusion Criteria
	Title	Authors	Journal	Year	Included	Phase 1. Review of Title/Abstract and Duplicates Removing				Phase 2. Review of Full Text
						Not within the scope of interest	Duplication	No full text available	Non-English	Traditional machine learning for classification, instead of deep learning	Not CNN-deep learning methods for classification	No validation performed	Unclear description of dataset
	Total: PubMed 158 + Scopus 265 = 423		423		61	168	62	7	4	32	58	29	2
	PubMed
1	A novel fully automated MRI-based deep-learning method for classification of IDH mutation status in brain gliomas.	Bangalore Yogananda CG, Shah BR, Vejdani-Jahromi M, Nalawade SS, Murugesan GK, Yu FF, Pinho MC, Wagner BC, Mickey B, Patel TR, Fei B, Madhuranthakam AJ, Maldjian JA.	Neuro Oncol.	2020		1
2	MRI-Based Deep-Learning Method for Determining Glioma MGMT Promoter Methylation Status.	Yogananda CGB, Shah BR, Nalawade SS, Murugesan GK, Yu FF, Pinho MC, Wagner BC, Mickey B, Patel TR, Fei B, Madhuranthakam AJ, Maldjian JA.	AJNR Am J Neuroradiol.	2021		1
3	Explainable Artificial Intelligence for Human-Machine Interaction in Brain Tumor Localization.	Esmaeili M, Vettukattil R, Banitalebi H, Krogh NR, Geitung JT.	J Pers Med.	2021		1
4	Transfer Learning in Magnetic Resonance Brain Imaging: A Systematic Review.	Valverde JM, Imani V, Abdollahzadeh A, De Feo R, Prakash M, Ciszek R, Tohka J.	J Imaging.	2021		1
5	Functional imaging using radiomic features in assessment of lymphoma.	Mayerhoefer ME, Umutlu L, Schöder H.	Methods.	2021		1
6	A Neural Network Approach to Identify Glioblastoma Progression Phenotype from Multimodal MRI.	Yan JL, Toh CH, Ko L, Wei KC, Chen PY.	Cancers (Basel).	2021		1
7	Handcrafted and Deep Learning-Based Radiomic Models Can Distinguish GBM from Brain Metastasis.	Liu Z, Jiang Z, Meng L, Yang J, Liu Y, Zhang Y, Peng H, Li J, Xiao G, Zhang Z, Zhou R.	J Oncol.	2021						1
8	Can artificial intelligence overtake human intelligence on the bumpy road towards glioma therapy?	Daisy PS, Anitha TS.	Med Oncol.	2021		1
9	A Review on a Deep Learning Perspective in Brain Cancer Classification.	S Tandel G, Biswas M, G Kakde O, Tiwari A, S Suri H, Turk M, Laird JR, Asare CK, A Ankrah A, N Khanna N, K Madhusudhan B, Saba L, Suri JS.	Cancers (Basel)	2019		1
10	Differentiation of Glioma Mimicking Encephalitis and Encephalitis Using Multiparametric MR-Based Deep Learning.	Wu W, Li J, Ye J, Wang Q, Zhang W, Xu S.	Front Oncol.	2021		1
11	Role of deep learning in brain tumor detection and classification (2015 to 2020): A review.	Nazir M, Shakil S, Khurshid K.	Comput Med Imaging Graph.	2021		1
12	A comparative study for glioma classification using deep convolutional neural networks.	Özcan H, Emiroğlu BG, Sabuncuoğlu H, Özdoğan S, Soyer A, Saygı T.	Math Biosci Eng.	2021	1
13	Efficient brain tumor detection and classification using magnetic resonance imaging.	Sundarasekar R, Appathurai A.	Biomed Phys Eng Express.	2021									1
14	Classification of glioblastoma versus primary central nervous system lymphoma using convolutional neural networks.	McAvoy M, Prieto PC, Kaczmarzyk JR, Fernández IS, McNulty J, Smith T, Yu KH, Gormley WB, Arnaout O.	Sci Rep.	2021	1
15	Differential Deep Convolutional Neural Network Model for Brain Tumor Classification.	Abd El Kader I, Xu G, Shuai Z, Saminu S, Javaid I, Salim Ahmad I.	Brain Sci.	2021	1
16	Multiclass magnetic resonance imaging brain tumor classification using artificial intelligence paradigm.	Tandel GS, Balestrieri A, Jujaray T, Khanna NN, Saba L, Suri JS.	Comput Biol Med.	2020	1
17	A Survey of Brain Tumor Segmentation and Classification Algorithms.	Biratu ES, Schwenker F, Ayano YM, Debelee TG.	J Imaging.	2021		1
18	Improving the noninvasive classification of glioma genetic subtype with deep learning and diffusion-weighted imaging.	Cluceru J, Interian Y, Phillips JJ, Molinaro AM, Luks TL, Alcaide-Leon P, Olson MP, Nair D, LaFontaine M, Shai A, Chunduru P, Pedoia V, Villanueva-Meyer JE, Chang SM, Lupo JM.	Neuro Oncol.	2021		1
19	Brain Tumor MR Image Classification Using Convolutional Dictionary Learning With Local Constraint.	Gu X, Shen Z, Xue J, Fan Y, Ni T.	Front Neurosci.	2021	1
20	Brain Tumor Segmentation Based on Deep Learning's Feature Representation.	Aboussaleh I, Riffi J, Mahraz AM, Tairi H.	J Imaging	2021		1
21	Characterizing Brain Tumor Regions Using Texture Analysis in Magnetic Resonance Imaging.	Yu Y, Wu X, Chen J, Cheng G, Zhang X, Wan C, Hu J, Miao S, Yin Y, Wang Z, Shan T, Jing S, Wang W, Guo J, Hu X, Liu Y.	Front Neurosci.	2021		1
22	A Transfer Learning-Based Active Learning Framework for Brain Tumor Classification.	Hao R, Namdar K, Liu L, Khalvati F.	Front Artif Intell.	2021	1
23	Brain Tumor Detection and Classification by Hybrid CNN-DWA Model Using MR Images.	El Kader IA, Xu G, Shuai Z, Saminu S.	Curr Med Imaging.	2021	1
24	Brain Tumor Detection Using Machine Learning and Deep Learning: A Review.	Lotlikar VS, Satpute N, Gupta A.	Curr Med Imaging.	2021		1
25	Observing deep radiomics for the classification of glioma grades.	Kobayashi K, Miyake M, Takahashi M, Hamamoto R.	Sci Rep.	2021						1
26	DarkASDNet: Classification of ASD on Functional MRI Using Deep Neural Network.	Ahammed MS, Niu S, Ahmed MR, Dong J, Gao X, Chen Y.	Front Neuroinform.	2021		1
27	MRI-Based Radiomics and Radiogenomics in the Management of Low-Grade Gliomas: Evaluating the Evidence for a Paradigm Shift.	Habib A, Jovanovich N, Hoppe M, Ak M, Mamindla P, R Colen R, Zinn PO.	J Clin Med.	2021		1
28	Clinical Applications of Artificial Intelligence, Machine Learning, and Deep Learning in the Imaging of Gliomas: A Systematic Review.	Alhasan AS.	Cureus.	2021		1
29	A computer-aided grading of glioma tumor using deep residual networks fusion.	Tripathi PC, Bag S.	Comput Methods Programs Biomed	2021	1
30	Classification of brain MRI tumor images based on deep learning PGGAN augmentation	Allah, A.M.G., Sarhan, A.M., Elshennawy, N.M.	Diagnostics	2021	1
31	A review on brain tumor diagnosis from MRI images: Practical implications, key achievements, and lessons learned.	Abd-Ellah MK, Awad AI, Khalaf AAM, Hamed HFA.	Magn Reson Imaging.	2019		1
32	An Automatic Deep Learning-Based Workflow for Glioblastoma Survival Prediction Using Preoperative Multimodal MR Images: A Feasibility Study.	Fu J, Singhrao K, Zhong X, Gao Y, Qi SX, Yang Y, Ruan D, Lewis JH.	Adv Radiat Oncol.	2021		1
33	The Application of Deep Convolutional Neural Networks to Brain Cancer Images: A Survey.	Zadeh Shirazi A, Fornaciari E, McDonnell MD, Yaghoobi M, Cevallos Y, Tello-Oquendo L, Inca D, Gomez GA.	J Pers Med.	2020		1
34	Demystifying Brain Tumor Segmentation Networks: Interpretability and Uncertainty Analysis.	Natekar P, Kori A, Krishnamurthi G	Front Comput Neurosci.	2020		1
35	Microscopic brain tumor detection and classification using 3D CNN and feature selection architecture.	Rehman A, Khan MA, Saba T, Mehmood Z, Tariq U, Ayesha N.	Microsc Res Tech.	2021							1
36	Brain tumor classification for MR images using transfer learning and fine-tuning.	Swati ZNK, Zhao Q, Kabir M, Ali F, Ali Z, Ahmed S, Lu J.	Comput Med Imaging Graph.	2019	1
37	Brain tumor classification in MRI image using convolutional neural network.	Khan HA, Jue W, Mushtaq M, Mushtaq MU.	Math Biosci Eng.	2020	1
38	MRI Brain Classification Using the Quantum Entropy LBP and Deep-Learning-Based Features.	Hasan AM, Jalab HA, Ibrahim RW, Meziane F, Al-Shamasneh AR, Obaiys SJ.	Entropy (Basel)	2020							1
39	MRI-Based Brain Tumor Classification Using Ensemble of Deep Features and Machine Learning Classifiers.	Kang J, Ullah Z, Gwak J.	Sensors (Basel).	2021						1
40	A framework for efficient brain tumor classification using MRI images.	Guan Y, Aamir M, Rahman Z, Ali A, Abro WA, Dayo ZA, Bhutta MS, Hu Z.	Math Biosci Eng.	2021	1
41	Brain tumor classification using deep CNN features via transfer learning.	Deepak S, Ameer PM.	Comput Biol Med.	2019	1
42	A review on brain tumor segmentation of MRI images.	Wadhwa A, Bhardwaj A, Singh Verma V.	Magn Reson Imaging.	2019		1
43	Deep semi-supervised learning for brain tumor classification.	Ge C, Gu IY, Jakola AS, Yang J.	BMC Med Imaging.	2020	1
44	Explainable Machine Learning Framework for Image Classification Problems: Case Study on Glioma Cancer Prediction.	Pintelas E, Liaskos M, Livieris IE, Kotsiantis S, Pintelas P.	J Imaging	2020		1
45	Deep learning in the detection of high-grade glioma recurrence using multiple MRI sequences: A pilot study.	Bacchi S, Zerner T, Dongas J, Asahina AT, Abou-Hamden A, Otto S, Oakden-Rayner L, Patel S.	J Clin Neurosci.	2019		1
46	Multi-modal magnetic resonance imaging-based grading analysis for gliomas by integrating radiomics and deep features.	Ning Z, Luo J, Xiao Q, Cai L, Chen Y, Yu X, Wang J, Zhang Y.	Ann Transl Med.	2021		1
47	A Robust and Novel Approach for Brain Tumor Classification Using Convolutional Neural Network	Tazin, T., Sarker, S., Gupta, P., (...), Idris, S.A., Alshazly, H.	Computational Intelligence and Neuroscience	2021		1
48	Deep learning with mixed supervision for brain tumor segmentation.	Mlynarski P, Delingette H, Criminisi A, Ayache N.	J Med Imaging (Bellingham).	2019		1
49	Brain MR Image Classification for Glioma Tumor detection using Deep Convolutional Neural Network Features.	Latif G, Iskandar DNFA, Alghazo J, Butt MM.	Curr Med Imaging.	2021							1
50	Glioma-Specific Diffusion Signature in Diffusion Kurtosis Imaging.	Hempel JM, Brendle C, Adib SD, Behling F, Tabatabai G, Castaneda Vega S, Schittenhelm J, Ernemann U, Klose U.	J Clin Med.	2021		1
51	Classification of brain tumor isocitrate dehydrogenase status using MRI and deep learning.	Nalawade S, Murugesan GK, Vejdani-Jahromi M, Fisicaro RA, Bangalore Yogananda CG, Wagner B, Mickey B, Maher E, Pinho MC, Fei B, Madhuranthakam AJ, Maldjian JA.	J Med Imaging (Bellingham).	2019		1
52	An artificial neural network model for glioma grading using image information.	Mao Y, Liao W, Cao D, Zhao L, Wu X, Kong L, Zhou G, Zhao Y, Wang D.	Zhong Nan Da Xue Xue Bao Yi Xue Ban.	2018					1
53	Brain tumor segmentation using K-means clustering and deep learning with synthetic data augmentation for classification.	Khan AR, Khan S, Harouni M, Abbasi R, Iqbal S, Mehmood Z.	Microsc Res Tech.	2021		1
54	Deep learning model integrating features and novel classifiers fusion for brain tumor segmentation.	Iqbal S, Ghani Khan MU, Saba T, Mehmood Z, Javaid N, Rehman A, Abbasi R.	Microsc Res Tech.	2019		1
55	Bone Age Assessment Empowered with Deep Learning: A Survey, Open Research Challenges and Future Directions.	Nadeem MW, Goh HG, Ali A, Hussain M, Khan MA, Ponnusamy VA.	Diagnostics (Basel).	2020		1
56	Deep Learning With Data Enhancement for the Differentiation of Solitary and Multiple Cerebral Glioblastoma, Lymphoma, and Tumefactive Demyelinating Lesion.	Zhang Y, Liang K, He J, Ma H, Chen H, Zheng F, Zhang L, Wang X, Ma X, Chen X.	Front Oncol.	2021								1
57	Automated Detection of Brain Tumor through Magnetic Resonance Images Using Convolutional Neural Network.	Gull S, Akbar S, Khan HU.	Biomed Res Int.	2021		1
58	Deep Learning and Texture-Based Semantic Label Fusion for Brain Tumor Segmentation.	Vidyaratne L, Alam M, Shboul Z, Iftekharuddin KM.	Proc SPIE Int Soc Opt Eng.	2018		1
59	A hybrid feature selection-based brain tumor detection and segmentation in multiparametric magnetic resonance imaging.	Chen H, Ban D, Qi XS, Pan X, Qiang Y, Yang Q.	Med Phys.	2021		1
60	Brain Tumor Detection and Classification on MR Images by a Deep Wavelet Auto-Encoder Model.	Abd El Kader I, Xu G, Shuai Z, Saminu S, Javaid I, Ahmad IS, Kamhi S.	Diagnostics (Basel).	2021							1
61	Domain Mapping and Deep Learning from Multiple MRI Clinical Datasets for Prediction of Molecular Subtypes in Low Grade Gliomas.	Ali MB, Gu IY, Berger MS, Pallud J, Southwell D, Widhalm G, Roux A, Vecchio TG, Jakola AS.	Brain Sci.	2020		1
62	Image-based Classification of Tumor Type and Growth Rate using Machine Learning: a preclinical study.	Tang TT, Zawaski JA, Francis KN, Qutub AA, Gaber MW.	Sci Rep.	2019		1
63	A Novel Deep Learning Method for Recognition and Classification of Brain Tumors from MRI Images.	Masood M, Nazir T, Nawaz M, Mehmood A, Rashid J, Kwon HY, Mahmood T, Hussain A.	Diagnostics (Basel).	2021								1
64	Brain Tumor Segmentation and Survival Prediction Using Multimodal MRI Scans With Deep Learning.	Sun L, Zhang S, Chen H, Luo L.	Front Neurosci.	2019		1
65	Conventional MRI radiomics in patients with suspected early- or pseudo-progression.	Bani-Sadr A, Eker OF, Berner LP, Ameli R, Hermier M, Barritault M, Meyronet D, Guyotat J, Jouanneau E, Honnorat J, Ducray F, Berthezene Y.	Neurooncol Adv.	2019		1
66	Brain tumor classification using fine-tuned GoogLeNet features and machine learning algorithms: IoMT enabled CAD system.	Sekhar A, Biswas S, Hazra R, Sunaniya AK, Mukherjee A, Yang L.	IEEE J Biomed Health Inform.	2021						1
67	An enhanced deep learning approach for brain cancer MRI images classification using residual networks.	Abdelaziz Ismael SA, Mohammed A, Hefny H.	Artif Intell Med.	2020	1
68	Improving Patch-Based Convolutional Neural Networks for MRI Brain Tumor Segmentation by Leveraging Location Information.	Kao PY, Shailja S, Jiang J, Zhang A, Khan A, Chen JW, Manjunath BS.	Front Neurosci.	2020		1
69	Glioma Grading on Conventional MR Images: A Deep Learning Study With Transfer Learning.	Yang Y, Yan LF, Zhang X, Han Y, Nan HY, Hu YC, Hu B, Yan SL, Zhang J, Cheng DL, Ge XW, Cui GB, Zhao D, Wang W.	Front Neurosci.	2018	1
70	Radiomics-based machine learning model for efficiently classifying transcriptome subtypes in glioblastoma patients from MRI.	Le NQK, Hung TNK, Do DT, Lam LHT, Dang LH, Huynh TT.	Comput Biol Med.	2021		1
71	Robust deep learning classification of adamantinomatous craniopharyngioma from limited preoperative radiographic images.	Prince EW, Whelan R, Mirsky DM, Stence N, Staulcup S, Klimo P, Anderson RCE, Niazi TN, Grant G, Souweidane M, Johnston JM	Sci Rep.	2020		1
72	Brain tumor segmentation and grading of lower-grade glioma using deep learning in MRI images.	Naser MA, Deen MJ.	Comput Biol Med.	2020	1
73	Molecular subtyping of diffuse gliomas using magnetic resonance imaging: comparison and correlation between radiomics and deep learning.	Li Y, Wei D, Liu X, Fan X, Wang K, Li S, Zhang Z, Ma K, Qian T, Jiang T, Zheng Y, Wang Y.	Eur Radiol.	2021		1
74	Deep Learning and Multi-Sensor Fusion for Glioma Classification Using Multistream 2D Convolutional Networks.	Ge C, Gu IY, Jakola AS, Yang J.	Annu Int Conf IEEE Eng Med Biol Soc.	2018		1
75	Deep Multi-Scale 3D Convolutional Neural Network (CNN) for MRI Gliomas Brain Tumor Classification.	Mzoughi H, Njeh I, Wali A, Slima MB, BenHamida A, Mhiri C, Mahfoudhe KB.	J Digit Imaging.	2020	1
76	Research on glioma magnetic resonance imaging segmentation based on dual-channel three-dimensional densely connected network	Huo Z, Du S, Chen Z, Dai W.	Sheng Wu Yi Xue Gong Cheng Xue Za Zhi.	2019		1
77	MRI to MGMT: predicting methylation status in glioblastoma patients using convolutional recurrent neural networks.	Han L, Kamdar MR.	Pac Symp Biocomput.	2018		1
78	A novel fully automated MRI-based deep-learning method for classification of 1p/19q co-deletion status in brain gliomas.	Yogananda CGB, Shah BR, Yu FF, Pinho MC, Nalawade SS, Murugesan GK, Wagner BC, Mickey B, Patel TR, Fei B, Madhuranthakam AJ, Maldjian JA.	Neurooncol Adv.	2020		1
79	Learning Cross-Modality Representations From Multi-Modal Images.	van Tulder G, de Bruijne M.	IEEE Trans Med Imaging.	2019		1
80	Deep learning approaches for automated classification and segmentation of head and neck cancers and brain tumors in magnetic resonance images: a meta-analysis study.	Badrigilan S, Nabavi S, Abin AA, Rostampour N, Abedi I, Shirvani A, Ebrahimi Moghaddam M.	Int J Comput Assist Radiol Surg.	2021		1
81	MIL normalization -- prerequisites for accurate MRI radiomics analysis.	Hu Z, Zhuang Q, Xiao Y, Wu G, Shi Z, Chen L, Wang Y, Yu J.	Comput Biol Med.	2021		1
82	Segmentation and Classification in Digital Pathology for Glioma Research: Challenges and Deep Learning Approaches.	Kurc T, Bakas S, Ren X, Bagari A, Momeni A, Huang Y, Zhang L, Kumar A, Thibault M, Qi Q, Wang Q, Kori A, Gevaert O, Zhang Y, Shen D, Khened M, Ding X, Krishnamurthi G, Kalpathy-Cramer J, Davis J, Zhao T, Gupta R, Saltz J, Farahani K.	Front Neurosci.	2020	1
83	Automated MRI based pipeline for segmentation and prediction of grade, IDH mutation and 1p19q co-deletion in glioma.	Decuyper M, Bonte S, Deblaere K, Van Holen R.	Comput Med Imaging Graph.	2021	1
84	State-of-the-Art CNN Optimizer for Brain Tumor Segmentation in Magnetic Resonance Images.	Yaqub M, Jinchao F, Zia MS, Arshid K, Jia K, Rehman ZU, Mehmood A.	Brain Sci.	2020		1
85	A Deep Learning Approach for Brain Tumor Classification and Segmentation Using a Multiscale Convolutional Neural Network.	Díaz-Pernas FJ, Martínez-Zarzuela M, Antón-Rodríguez M, González-Ortega D.	Healthcare (Basel).	2021	1
86	Automatic Semantic Segmentation of Brain Gliomas from MRI Images Using a Deep Cascaded Neural Network.	Cui S, Mao L, Jiang J, Liu C, Xiong S.	J Healthc Eng.	2018		1
87	Machine learning applications to neuroimaging for glioma detection and classification: An artificial intelligence augmented systematic review.	Buchlak QD, Esmaili N, Leveque JC, Bennett C, Farrokhi F, Piccardi M.	J Clin Neurosci.	2021		1
88	MRI-based Identification and Classification of Major Intracranial Tumor Types by Using a 3D Convolutional Neural Network: A Retrospective Multi-institutional Analysis.	Chakrabarty S, Sotiras A, Milchenko M, LaMontagne P, Hileman M, Marcus D.	Radiol Artif Intell.	2021		1
89	Survival prediction in glioblastoma on post-contrast magnetic resonance imaging using filtration based first-order texture analysis: Comparison of multiple machine learning models.	Priya S, Agarwal A, Ward C, Locke T, Monga V, Bathla G.	Neuroradiol J.	2021		1
90	Automated glioma grading on conventional MRI images using deep convolutional neural networks.	Zhuge Y, Ning H, Mathen P, Cheng JY, Krauze AV, Camphausen K, Miller RW.	Med Phys.	2020	1
91	Glioma Tumor Grade Identification Using Artificial Intelligent Techniques.	Ahammed Muneer K V, Rajendran VR, K PJ.	J Med Syst.	2019	1
92	A hybrid feature selection-based approach for brain tumor detection and automatic segmentation on multiparametric magnetic resonance images.	Chen H, Ban D, Qi XS, Pan X, Qiang Y, Yang Q.	Med Phys.	2021		1
93	Optimizing Neuro-Oncology Imaging: A Review of Deep Learning Approaches for Glioma Imaging.	Shaver MM, Kohanteb PA, Chiou C, Bardis MD, Chantaduly C, Bota D, Filippi CG, Weinberg B, Grinband J, Chow DS, Chang PD.	Cancers (Basel).	2019		1
94	Brain Tumors Classification for MR images based on Attention Guided Deep Learning Model.	Zhang Y, Wang S, Wu H, Hu K, Ji S.	Annu Int Conf IEEE Eng Med Biol Soc.	2021		1
95	SPectroscOpic prediction of bRain Tumours (SPORT): study protocol of a prospective imaging trial.	Franco P, Würtemberger U, Dacca K, Hübschle I, Beck J, Schnell O, Mader I, Binder H, Urbach H, Heiland DH.	BMC Med Imaging.	2020		1
96	Hierarchical-order multimodal interaction fusion network for grading gliomas.	He M, Han K, Zhang Y, Chen W.	Phys Med Biol.	2021	1
97	An Enhancement of Deep Learning Algorithm for Brain Tumor Segmentation Using Kernel Based CNN with M-SVM.	Thillaikkarasi R, Saravanan S.	J Med Syst.	2019		1
98	BrainMRNet: Brain tumor detection using magnetic resonance images with a novel convolutional neural network model.	Toğaçar M, Ergen B, Cömert Z.	Med Hypotheses.	2020								1
99	Synergy Factorized Bilinear Network with a Dual Suppression Strategy for Brain Tumor Classification in MRI.	Xiao G, Wang H, Shen J, Chen Z, Zhang Z, Ge X.	Micromachines (Basel)	2021	1
100	Machine learning-based differentiation between multiple sclerosis and glioma WHO II-IV using O-(2-[18F] fluoroethyl)-L-tyrosine positron emission tomography.	Kebir S, Rauschenbach L, Weber M, Lazaridis L, Schmidt T, Keyvani K, Schäfer N, Milia A, Umutlu L, Pierscianek D, Stuschke M, Forsting M, Sure U, Kleinschnitz C, Antoch G, Colletti PM, Rubello D, Herrmann K, Herrlinger U, Scheffler B, Bundschuh RA, Glas M.	J Neurooncol.	2021		1
101	Application of an Artificial Intelligence Algorithm to Prognostically Stratify Grade II Gliomas.	Cesselli D, Ius T, Isola M, Del Ben F, Da Col G, Bulfoni M, Turetta M, Pegolo E, Marzinotto S, Scott CA, Mariuzzi L, Di Loreto C, Beltrami AP, Skrap M.	Cancers (Basel).	2019		1
102	Radiomics-based machine learning methods for isocitrate dehydrogenase genotype prediction of diffuse gliomas.	Wu S, Meng J, Yu Q, Li P, Fu S.	J Cancer Res Clin Oncol.	2019		1
103	Multiparametric MRI Features Predict the SYP Gene Expression in Low-Grade Glioma Patients: A Machine Learning-Based Radiomics Analysis.	Xiao Z, Yao S, Wang ZM, Zhu DM, Bie YN, Zhang SZ, Chen WL.	Front Oncol.	2021		1
104	Automatic Prediction of MGMT Status in Glioblastoma via Deep Learning-Based MR Image Analysis.	Chen X, Zeng M, Tong Y, Zhang T, Fu Y, Li H, Zhang Z, Cheng Z, Xu X, Yang R, Liu Z, Wei X, Jiang X.	Biomed Res Int.	2020		1
105	Prediction of lower-grade glioma molecular subtypes using deep learning.	Matsui Y, Maruyama T, Nitta M, Saito T, Tsuzuki S, Tamura M, Kusuda K, Fukuya Y, Asano H, Kawamata T, Masamune K, Muragaki Y.	J Neurooncol.	2020		1
106	Prediction of IDH and TERT promoter mutations in low-grade glioma from magnetic resonance images using a convolutional neural network.	Fukuma R, Yanagisawa T, Kinoshita M, Shinozaki T, Arita H, Kawaguchi A.	Sci Rep.	2019		1
107	Tumor type detection in brain MR images of the deep model developed using hypercolumn technique, attention modules, and residual blocks.	Toğaçar M, Ergen B, Cömert Z.	Med Biol Eng Comput.	2021		1
108	Analysis of Brain MRI Images Using Improved CornerNet Approach.	Nawaz M, Nazir T, Masood M, Mehmood A, Mahum R, Khan MA, Kadry S, Thinnukool O.	Diagnostics (Basel).	2021								1
109	Detection of tumors on brain MRI images using the hybrid convolutional neural network architecture.	Çinar A, Yildirim M.	Med Hypotheses.	2020	1
110	Context aware deep learning for brain tumor segmentation, subtype classification, and survival prediction using radiology images.	Pei L, Vidyaratne L, Rahman MM, Iftekharuddin KM.	Sci Rep.	2020	1
111	Assessing Versatile Machine Learning Models for Glioma Radiogenomic Studies across Hospitals.	Kawaguchi RK, Takahashi M, Miyake M, Kinoshita M, Takahashi S, Ichimura K, Hamamoto R, Narita Y, Sese J.	Cancers (Basel).	2021		1
112	DC-AL GAN: Pseudoprogression and true tumor progression of glioblastoma multiform image classification based on DCGAN and AlexNet.	Li M, Tang H, Chan MD, Zhou X, Qian X.	Med Phys.	2020						1
113	Deep white matter analysis (DeepWMA): Fast and consistent tractography segmentation.	Zhang F, Cetin Karayumak S, Hoffmann N, Rathi Y, Golby AJ, O'Donnell LJ.	Med Image Anal.	2020		1
114	Improved Prediction of Surgical Resectability in Patients with Glioblastoma using an Artificial Neural Network.	Marcus AP, Marcus HJ, Camp SJ, Nandi D, Kitchen N, Thorne L.	Sci Rep.	2020							1
115	A hybrid approach based on multiple Eigenvalues selection (MES) for the automated grading of a brain tumor using MRI.	Al-Saffar ZA, Yildirim T.	Comput Methods Programs Biomed.	2021		1
116	Multi-Disease Segmentation of Gliomas and White Matter Hyperintensities in the BraTS Data Using a 3D Convolutional Neural Network.	Rudie JD, Weiss DA, Saluja R, Rauschecker AM, Wang J, Sugrue L, Bakas S, Colby JB.	Front Comput Neurosci.	2019		1
117	A Multiparametric MRI-Based Radiomics Analysis to Efficiently Classify Tumor Subregions of Glioblastoma: A Pilot Study in Machine Learning.	Chiu FY, Le NQK, Chen CY.	J Clin Med.	2021						1
118	Identification and classification of brain tumor MRI images with feature extraction using DWT and probabilistic neural network.	Varuna Shree N, Kumar TNR.	Brain Inform.	2018							1
119	Differentiation of multiple sclerosis lesions and low-grade brain tumors on MRS data: machine learning approaches.	Ekşi Z, Özcan ME, Çakıroğlu M, Öz C, Aralaşmak A.	Neurol Sci.	2021						1
120	Predicting Short-Term Survival after Gross Total or Near Total Resection in Glioblastomas by Machine Learning-Based Radiomic Analysis of Preoperative MRI.	Cepeda S, Pérez-Nuñez A, García-García S, García-Pérez D, Arrese I, Jiménez-Roldán L, García-Galindo M, González P, Velasco-Casares M, Zamora T, Sarabia R.	Cancers (Basel).	2021		1
121	Unsupervised end-to-end Brain Tumor Magnetic Resonance Image Registration using RBCNN: Rigid Transformation, B-Spline Transformation and Convolutional Neural Network.	Sankareswaran SP, Krishnan M.	Curr Med Imaging.	2021		1
122	Evaluation of magnetic resonance image segmentation in brain low-grade gliomas using support vector machine and convolutional neural network.	Yang Q, Zhang H, Xia J, Zhang X.	Quant Imaging Med Surg.	2021		1
123	Predicting the Local Response of Metastatic Brain Tumor to Gamma Knife Radiosurgery by Radiomics With a Machine Learning Method.	Kawahara D, Tang X, Lee CK, Nagata Y, Watanabe Y.	Front Oncol.	2021		1
124	Brain tumor segmentation using 3D Mask R-CNN for dynamic susceptibility contrast enhanced perfusion imaging.	Jeong J, Lei Y, Kahn S, Liu T, Curran WJ, Shu HK, Mao H, Yang X.	Phys Med Biol.	2020		1
125	FWNNet: Presentation of a New Classifier of Brain Tumor Diagnosis Based on Fuzzy Logic and the Wavelet-Based Neural Network Using Machine-Learning Methods.	Ahmadi M, Dashti Ahangar F, Astaraki N, Abbasi M, Babaei B.	Comput Intell Neurosci.	2021						1
126	Improving the Reliability of Pharmacokinetic Parameters at Dynamic Contrast-enhanced MRI in Astrocytomas: A Deep Learning Approach.	Choi KS, You SH, Han Y, Ye JC, Jeong B, Choi SH.	Radiology.	2020		1
127	Radiomic features and multilayer perceptron network classifier: a robust MRI classification strategy for distinguishing glioblastoma from primary central nervous system lymphoma.	Yun J, Park JE, Lee H, Ham S, Kim N, Kim HS.	Sci Rep.	2019							1
128	Meningioma Consistency Can Be Defined by Combining the Radiomic Features of Magnetic Resonance Imaging and Ultrasound Elastography. A Pilot Study Using Machine Learning Classifiers.	Cepeda S, Arrese I, García-García S, Velasco-Casares M, Escudero-Caro T, Zamora T, Sarabia R.	World Neurosurg.	2021						1
129	A computer-aided diagnosis system for brain magnetic resonance imaging images using a novel differential feature neural network.	Huang Z, Xu H, Su S, Wang T, Luo Y, Zhao X, Liu Y, Song G, Zhao Y.	Comput Biol Med.	2020	1
130	SoftSeg: Advantages of soft versus binary training for image segmentation.	Gros C, Lemay A, Cohen-Adad J.	Med Image Anal.	2021		1
131	Deep Learning Methodology for Differentiating Glioma Recurrence From Radiation Necrosis Using Multimodal Magnetic Resonance Imaging: Algorithm Development and Validation.	Gao Y, Xiao X, Han B, Li G, Ning X, Wang D, Cai W, Kikinis R, Berkovsky S, Di Ieva A, Zhang L, Ji N, Liu S.	JMIR Med Inform.	2020								1
132	Radiogenomics of lower-grade gliomas: machine learning-based MRI texture analysis for predicting 1p/19q codeletion status.	Kocak B, Durmaz ES, Ates E, Sel I, Turgut Gunes S, Kaya OK, Zeynalova A, Kilickesmez O.	Eur Radiol.	2020		1
133	An efficient approach to diagnose brain tumors through deep CNN.	Mohammed BA, Al-Ani MS.	Math Biosci Eng.	2020	1
134	Y-net: a reducing gaussian noise convolutional neural network for MRI brain tumor classification with NADE concatenation.	Hashemzehi R, Seyyed Mahdavi SJ, Kheirabadi M, Kamel SR.	Biomed Phys Eng Express.	2021								1
135	Deep white matter analysis: fast, consistent tractography segmentation across populations and dMRI acquisitions.	Zhang F, Hoffmann N, Karayumak SC, Rathi Y, Golby AJ, O'Donnell LJ.	Med Image Comput Comput Assist Interv.	2019		1
136	A Scalable Natural Language Processing for Inferring BT-RADS Categorization from Unstructured Brain Magnetic Resonance Reports.	Lee SJ, Weinberg BD, Gore A, Banerjee I.	J Digit Imaging.	2020		1
137	Diffusion tensor image features predict IDH genotype in newly diagnosed WHO grade II/III gliomas.	Eichinger P, Alberts E, Delbridge C, Trebeschi S, Valentinitsch A, Bette S, Huber T, Gempt J, Meyer B, Schlegel J, Zimmer C, Kirschke JS, Menze BH, Wiestler B.	Sci Rep.	2017		1
138	Feature-Guided Deep Radiomics for Glioblastoma Patient Survival Prediction.	Shboul ZA, Alam M, Vidyaratne L, Pei L, Elbakary MI, Iftekharuddin KM.	Front Neurosci.	2019		1
139	Brain tumor grading based on Neural Networks and Convolutional Neural Networks.	Yuehao Pan, Weimin Huang, Zhiping Lin, Wanzheng Zhu, Jiayin Zhou, Wong J, Zhongxiang Ding.	Annu Int Conf IEEE Eng Med Biol Soc.	2015								1
140	Fully automated analysis combining [(18)F]-FET-PET and multiparametric MRI including DSC perfusion and APTw imaging: a promising tool for objective evaluation of glioma progression.	Paprottka KJ, Kleiner S, Preibisch C, Kofler F, Schmidt-Graf F, Delbridge C, Bernhardt D, Combs SE, Gempt J, Meyer B, Zimmer C, Menze BH, Yakushev I, Kirschke JS, Wiestler B.	Eur J Nucl Med Mol Imaging.	2021		1
141	Application of MR morphologic, diffusion tensor, and perfusion imaging in the classification of brain tumors using machine learning scheme.	Shrot S, Salhov M, Dvorski N, Konen E, Averbuch A, Hoffmann C.	Neuroradiology.	2019		1
142	Three-dimensional textural features of conventional MRI improve diagnostic classification of childhood brain tumours.	Fetit AE, Novak J, Peet AC, Arvanitits TN.	NMR Biomed.	2015		1
143	An expert system for brain tumor detection: Fuzzy C-means with super resolution and convolutional neural network with extreme learning machine.	Özyurt F, Sert E, Avcı D.	Med Hypotheses.	2020		1
144	Survival prediction of patients suffering from glioblastoma based on two-branch DenseNet using multi-channel features.	Fu X, Chen C, Li D.	Int J Comput Assist Radiol Surg.	2021		1
145	Trends in Development of Novel Machine Learning Methods for the Identification of Gliomas in Datasets That Include Non-Glioma Images: A Systematic Review.	Subramanian H, Dey R, Brim WR, Tillmanns N, Cassinelli Petersen G, Brackett A, Mahajan A, Johnson M, Malhotra A, Aboian M.	Front Oncol	2021		1
146	A new approach for brain tumor diagnosis system: Single image super resolution based maximum fuzzy entropy segmentation and convolutional neural network.	Sert E, Özyurt F, Doğantekin A.	Med Hypotheses.	2019						1
147	Multiscale CNNs for Brain Tumor Segmentation and Diagnosis.	Zhao L, Jia K.	Comput Math Methods Med	2016		1
148	Multimodal MRI synthesis using unified generative adversarial networks.	Dai X, Lei Y, Fu Y, Curran WJ, Liu T, Mao H, Yang X.	Med Phys.	2020		1
149	Hybrid gray wolf optimizer-artificial neural network classification approach for magnetic resonance brain images.	Ahmed HM, Youssef BAB, Elkorany AS, Saleeb AA, Abd El-Samie F.	Appl Opt.	2018							1
150	Chaotic Harris Hawks Optimization with Quasi-Reflection-Based Learning: An Application to Enhance CNN Design.	Basha J, Bacanin N, Vukobrat N, Zivkovic M, Venkatachalam K, Hubálovský S, Trojovský P.	Sensors (Basel).	2021		1
151	A Novel Method for Classifying Liver and Brain Tumors Using Convolutional Neural Networks, Discrete Wavelet Transform and Long Short-Term Memory Networks.	Kutlu H, Avcı E.	Sensors (Basel).	2019							1
152	Machine learning methods for the classification of gliomas: Initial results using features extracted from MR spectroscopy.	Ranjith G, Parvathy R, Vikas V, Chandrasekharan K, Nair S.	Neuroradiol J.	2015						1
153	Prediction of 1p/19q Codeletion in Diffuse Glioma Patients Using Pre-operative Multiparametric Magnetic Resonance Imaging.	Kim D, Wang N, Ravikumar V, Raghuram DR, Li J, Patel A, Wendt RE 3rd, Rao G, Rao A.	Front Comput Neurosci.	2019		1
154	Glioma grading using a machine-learning framework based on optimized features obtained from T(1) perfusion MRI and volumes of tumor components.	Sengupta A, Ramaniharan AK, Gupta RK, Agarwal S, Singh A.	J Magn Reson Imaging.	2019						1
155	A novel extended Kalman filter with support vector machine based method for the automatic diagnosis and segmentation of brain tumors.	Chen B, Zhang L, Chen H, Liang K, Chen X.	Comput Methods Programs Biomed.	2021		1
156	A Novel Approach for Fully Automatic Intra-Tumor Segmentation With 3D U-Net Architecture for Gliomas.	Baid U, Talbar S, Rane S, Gupta S, Thakur MH, Moiyadi A, Sable N, Akolkar M, Mahajan A.	Front Comput Neurosci.	2020		1
157	A Novel Intelligent System for Brain Tumor Diagnosis Based on a Composite Neutrosophic-Slantlet Transform Domain for Statistical Texture Feature Extraction.	Wady SH, Yousif RZ, Hasan HR.	Biomed Res Int.	2020						1
158	A mathematical theory of shape and neuro-fuzzy methodology-based diagnostic analysis: a comparative study on early detection and treatment planning of brain cancer.	Kar S, Majumder DD.	Int J Clin Oncol.	2017							1
	Scopus
1	Y-net: a reducing gaussian noise convolutional neural network for MRI brain tumor classification with NADE concatenation.	Hashemzehi R, Seyyed Mahdavi SJ, Kheirabadi M, Kamel SR.	Biomed Phys Eng Express.	2021			1
2	Deep neural network with generative adversarial networks pre-training for brain tumor classification based on MR images	Navid Ghassemi, Afshin Shoeibi, Modjtaba Rouhani	Biomedical Signal Processing and Control	2019	1
3	Deep Learning and Multi-Sensor Fusion for Glioma Classification Using Multistream 2D Convolutional Networks.	Ge C, Gu IY, Jakola AS, Yang J.	Annu Int Conf IEEE Eng Med Biol Soc.	2018			1
4	Application of deep transfer learning for automated brain abnormality classification using MR images	Muhammed Talo, Ulas Baran Baloglu, Özal Yıldırım, U Rajendra Acharya	Cognitive Systems Research	2018	1
5	Classification of brain MRI tumor images based on deep learning PGGAN augmentation	Allah, A.M.G., Sarhan, A.M., Elshennawy, N.M.	Diagnostics	2021			1
6	Hybrid gray wolf optimizer–artificial neural network classification approach for magnetic resonance brain images	Ahmed, H.M., Youssef, B.A.B., Elkorany, A.S., Saleeb, A.A., El-Samie, F.A.	Applied Optics	2018							1
7	Safe engineering application for detection of medical image using deep convolutional neural network	Saraswat, A., Kalra, B.	Journal of Green Engineering	2020				1
8	A Hybrid CNN-SVM Threshold Segmentation Approach for Tumor Detection and Classification of MRI Brain Images	M.O. Khairandish, M. Sharma, V. Jain, J.M. Chatterjee, N.Z. Jhanjhi,	IRBM	2021								1
9	Differential Deep Convolutional Neural Network Model for Brain Tumor Classification.	Abd El Kader I, Xu G, Shuai Z, Saminu S, Javaid I, Salim Ahmad I.	Brain Sci.	2021			1
10	Detection of brain tumors from MRI images base on deep learning using hybrid model CNN and NADE	Raheleh Hashemzehi, Seyyed Javad Seyyed Mahdavi, Maryam Kheirabadi, Seyed Reza Kamel	Biocybernetics and Biomedical Engineering	2020		1
11	Brain tumor image classification and grading using convolutional neural network and particle swarm optimization algorithm	Rajini, N.H.	International Journal of Engineering and Advanced Technology	2019	1
12	Brain tumor classification in magnetic resonance image using hard swish-based RELU activation function-convolutional neural network	Alhassan, A.M., Zainon, W.M.N.W.	Neural Computing and Applications	2021	1
13	Brain tumor segmentation and grading of lower-grade glioma using deep learning in MRI images.	Naser MA, Deen MJ.	Comput Biol Med.	2020			1
14	An artificial neural network model for glioma grading using image information.	Mao Y, Liao W, Cao D, Zhao L, Wu X, Kong L, Zhou G, Zhao Y, Wang D.	Zhong Nan Da Xue Xue Bao Yi Xue Ban.	2018			1
15	Deep neural networks with transfer learning model for brain tumors classification	Bulla, P., Anantha, L., Peram, S.	Traitement du Signal	2020	1
16	Deep semi-supervised learning for brain tumor classification.	Ge C, Gu IY, Jakola AS, Yang J.	BMC Med Imaging.	2020			1
17	MRI-Based Brain Tumor Classification Using Ensemble of Deep Features and Machine Learning Classifiers.	Kang J, Ullah Z, Gwak J.	Sensors (Basel).	2021			1
18	Performance Analysis of Glioma Brain Tumor Segmentation Using CNN Deep Learning Approach	Tamilarasi, M.	IETE Journal of Research	2021		1
19	Brain Tumors Classification for MR images based on Attention Guided Deep Learning Model.	Zhang Y, Wang S, Wu H, Hu K, Ji S.	Annu Int Conf IEEE Eng Med Biol Soc.	2021			1
20	Noninvasive grading of glioma tumor using magnetic resonance imaging with convolutional neural networks	Khawaldeh, S., Pervaiz, U., Rafiq, A., Alkhawaldeh, R.S.	Applied Sciences (Switzerland)	2017	1
21	Analysis and classification of malignancy in pancreatic magnetic resonance images using neural network techniques	Balasubramanian, A.D., Murugan, P.R., Thiyagarajan, A.P.	International Journal of Imaging Systems and Technology	2019							1
22	Magnetic resonance imaging-based brain tumor grades classification and grading via convolutional neural networks and genetic algorithms	Amin Kabir Anaraki, Moosa Ayati, Foad Kazemi	Biocybernetics and Biomedical Engineering	2018	1
23	Risk-free WHO grading of astrocytoma using convolutional neural networks from MRI images	Gilanie, G., Bajwa, U.I., Waraich, M.M., Anwar, M.W.	Multimedia Tools and Applications	2021	1
24	Three-class classification of brain magnetic resonance images using average-pooling convolutional neural network	Kakarla, J., Isunuri, B.V., Doppalapudi, K.S., Bylapudi, K.S.R.	International Journal of Imaging Systems and Technology	2021	1
25	Early tumor diagnosis in brain MR images via deep convolutional neural network model	Das, T.K., Roy, P.K., Uddin, M., (...), Chang, C.-Y., Syed-Abdul, S.	Computers, Materials and Continua	2021	1
26	Comparative analysis of performance of deep cnn based framework for brain mri classification using transfer learning	KULKARNI, S.M., SUNDARI, G.	Journal of Engineering Science and Technology	2021	1
27	High precision brain tumor classification model based on deep transfer learning and stacking concepts	El Hamdaoui, H., Benfares, A., Boujraf, S., (...), Maaroufi, M., Qjidaa, H.	Indonesian Journal of Electrical Engineering and Computer Science	2021	1
28	Brain tumor classification of MRI images using deep convolutional neural network	Kuraparthi, S., Reddy, M.K., Sujatha, C.N., (...), Kora, P., Sravan, V.	Traitement du Signal	2021						1
29	The classification of gliomas based on a Pyramid dilated convolution resnet model	Zhenyu Lu, Yanzhong Bai, Yi Chen, Chunqiu Su, Shanshan Lu, Tianming Zhan, Xunning Hong, Shuihua Wang,	Pattern Recognition Letters	2020								1
30	An MRI-based deep learning approach for efficient classification of brain tumors	Haq, E.U., Jianjun, H., Li, K., Haq, H.U., Zhang, T.	Journal of Ambient Intelligence and Humanized Computing	2021								1
31	Multi-grade brain tumor classification using deep CNN with extensive data augmentation	Muhammad Sajjad, Salman Khan, Khan Muhammad, Wanqing Wu, Amin Ullah, Sung Wook Baik	Journal of Computational Science	2018	1
32	Mri brain scan classification using LFOA-based SVM method with deep and handcrafted feature extraction strategy	Deolia, V.K., Sharma, A.	Journal of Advanced Research in Dynamical and Control Systems	2019						1
33	A Modified Deep Convolutional Neural Network for Abnormal Brain Image Classification	Jude Hemanth, D., Anitha, J., Naaji, A., (...), Popescu, D.E., Hoang Son, L.	IEEE Access	2019								1
34	Enlarged Training Dataset by Pairwise GANs for Molecular-Based Brain Tumor Classification	Ge, C., Gu, I.Y.-H., Jakola, A.S., Yang, J.	IEEE Access	2020							1
35	Multiscale-based multimodal image classification of brain tumor using deep learning method	Rajasree, R., Columbus, C.C., Shilaja, C.	Neural Computing and Applications	2021	1
36	Tumor type detection in brain MR images of the deep model developed using hypercolumn technique, attention modules, and residual blocks.	Toğaçar M, Ergen B, Cömert Z.	Med Biol Eng Comput.	2021			1
37	Classification of brain tumor isocitrate dehydrogenase status using MRI and deep learning	Nalawade, S., Murugesan, G.K., Vejdani-Jahromi, M., (...), Madhuranthakam, A.J., Maldjian, J.A.	Journal of Medical Imaging	2019			1
38	A Transfer Learning-Based Active Learning Framework for Brain Tumor Classification.	Hao, R., Namdar, K., Liu, L., Khalvati, F.	Frontiers in Artificial Intelligence	2021			1
39	Brain tumors classification with deep learning using data augmentation | [Veri çoǧaltma kullanilarak derin öǧrenme ile beyin tümörlerinin siniflandirilmasi]	Gürkahraman, K., Karakiş, R.	Journal of the Faculty of Engineering and Architecture of Gazi University	2021					1
40	Optimised convolutional neural network for classification of brain tumour	Kumarvel, T., Natesan, P., Prakash, P.S., Loheswaran, K.	Oxidation Communications	2021				1
41	A deep learning model integrating convolution neural network and multiple kernel K means clustering for segmenting brain tumor in magnetic resonance images	Ragupathy, B., Karunakaran, M.	International Journal of Imaging Systems and Technology	2021		1
42	Automated Categorization of Brain Tumor from MRI Using CNN features and SVM	Deepak, S., Ameer, P.M.	Journal of Ambient Intelligence and Humanized Computing	2021						1
43	Brain tumor detection through content-based medical image retrieval using roi segmentation with Harmony search optimization	Moirangthem, M., Singh, T.R.	Journal of Green Engineering	2020				1
44	Predicting survival of brain tumor patients using deep learning	Sharmila Agnal, A., Arun Deepak, C., Venkatesh, J., Sudarshan, S., Pranav, A.	International Journal of Innovative Technology and Exploring Engineering	2019		1
45	Two-phase multi-model automatic brain tumour diagnosis system from magnetic resonance images using convolutional neural networks	Abd-Ellah, M.K., Awad, A.I., Khalaf, A.A.M., Hamed, H.F.A.	Eurasip Journal on Image and Video Processing	2018						1
46	Development of brain tumor segmentation of magnetic resonance imaging (MRI) using u-net deep learning	Jwaid, W.M., Al-Hussein, Z.S.M., Sabry, A.H.	Eastern-European Journal of Enterprise Technologies	2021		1
47	Multi tumor classification in mr brain images through deep feature extraction using cnn and supervised classifier	Anilkumar, B., Kumar, P.R.	International Journal on Emerging Technologies	2020						1
48	MRI-based Identification and Classification of Major Intracranial Tumor Types by Using a 3D Convolutional Neural Network: A Retrospective Multi-institutional Analysis.	Chakrabarty S, Sotiras A, Milchenko M, LaMontagne P, Hileman M, Marcus D.	Radiol Artif Intell.	2021			1
49	Deep CNN for Brain Tumor Classification	Ayadi, W., Elhamzi, W., Charfi, I., Atri, M.	Neural Processing Letters	2021	1
50	Whale Harris hawks optimization based deep learning classifier for brain tumor detection using MRI images	D. Rammurthy, P. K. Mahesh	Journal of King Saud University - Computer and Information Sciences	2020								1
51	Detection and diagnosis of brain tumors using deep learning convolutional neural networks	Gurunathan, A., Krishnan, B.	International Journal of Imaging Systems and Technology	2021								1
52	Big data analysis for brain tumor detection: Deep convolutional neural networks	Javeria Amin, Muhammad Sharif, Mussarat Yasmin, Steven Lawrence Fernandes	Future Generation Computer Systems	2018								1
53	Denoising of Images Using Deep Convolutional Autoencoders for Brain Tumor Classification	Vankayalapati, R., Muddana, A.L.	Revue d'Intelligence Artificielle	2021								1
54	Radiomic features and multilayer perceptron network classifier: a robust MRI classification strategy for distinguishing glioblastoma from primary central nervous system lymphoma.	Yun J, Park JE, Lee H, Ham S, Kim N, Kim HS.	Sci Rep.	2019			1
55	Brain tumor classification for MR images using transfer learning and fine-tuning.	Swati ZNK, Zhao Q, Kabir M, Ali F, Ali Z, Ahmed S, Lu J.	Comput Med Imaging Graph.	2019			1
56	Accurate Classification and Detection of Brain Cancer Cells in MRI and CT Images using Nano Contrast Agents	Ruba, T., Tamilselvi, R., Parisa Beham, M., Aparna, N.	Biomedical and Pharmacology Journal	2020								1
57	Classification & feature extraction of brain tumor from mri images using modified ann approach	Singh, H., Solanki, R.S.	International Journal of Electrical and Electronics Research	2021							1
58	Significant LOOP with clustering approach and optimization enabled deep learning classifier for the brain tumor segmentation and classification	Jemimma, T.A., Raj, Y.J.V.	Multimedia Tools and Applications	2021								1
59	Tumor diagnosis using gray level cooccurrence matrix and artificial neural network	Gaikwad, M.P., Dhumale, R.B.	International Journal of Advanced Science and Technology	2020							1
60	Automatic Semantic Segmentation of Brain Gliomas from MRI Images Using a Deep Cascaded Neural Network.	Cui S, Mao L, Jiang J, Liu C, Xiong S.	J Healthc Eng.	2018			1
61	Multiclassifier for severity-level categorization of glioma tumors using multimodal magnetic resonance imaging brain images	Michael Mahesh, K., Arokia Renjit, J.	International Journal of Imaging Systems and Technology	2020								1
62	Glioma Grading on Conventional MR Images: A Deep Learning Study With Transfer Learning.	Yang Y, Yan LF, Zhang X, Han Y, Nan HY, Hu YC, Hu B, Yan SL, Zhang J, Cheng DL, Ge XW, Cui GB, Zhao D, Wang W.	Front Neurosci.	2018			1
63	Supervised Learning-Based Cancer Detection	Sikder, J., Das, U.K., Chakma, R.J.	International Journal of Advanced Computer Science and Applications	2021		1
64	Low volume brain tumor extraction	Shabu, S.L.J., Jayakumar, C., Christy, A., Naveena, P., Sri, G.K.	Journal of Computational and Theoretical Nanoscience	2019		1
65	Context aware deep learning for brain tumor segmentation, subtype classification, and survival prediction using radiology images.	Pei L, Vidyaratne L, Rahman MM, Iftekharuddin KM.	Sci Rep.	2020			1
66	Adaptive fuzzy deformable fusion and optimized CNN with ensemble classification for automated brain tumor diagnosis	Murthy, M.Y.B., Koteswararao, A., Babu, M.S.	Biomedical Engineering Letters	2021							1
67	A unique six sigma based segmentation technique for brain tumor detection and classification using hybrid cnn-svm model	Kothari, A., Indira, B.	International Journal of Recent Technology and Engineering	2019						1
68	Performance optimisation of deep learning models using majority voting algorithm for brain tumour classification.	Gopal S. Tandel, Ashish Tiwari, O. G. Kakde	Computers in Biology and Medicine	2021	1
69	MRI geometric distortion for brain tumor detection and segmentation	Suganya, S., Padmaja, S., Suseendran, G.	Journal of Advanced Research in Dynamical and Control Systems	2017		1
70	Performance analysis of classification techniques of human brain MRI images	Chauhan, N., Choi, B.-J.	International Journal of Fuzzy Logic and Intelligent Systems	2019								1
71	Detection and classification of MRI brain tumour using GLCM and enhanced K-NN	Anantharajan, S., Gunasekaran, S.	Comptes Rendus de L'Academie Bulgare des Sciences	2021						1
72	Localization and classification of brain tumor using machine learning & deep learning techniques	Kaur, R., Doegar, A.	International Journal of Innovative Technology and Exploring Engineering	2019		1
73	Automated optimized classification techniques for magnetic resonance brain image	Elkorany, A.S., Elsharkawy, Z.F.	Multimedia Tools and Applications	2020							1
74	A deep learning model integrating SK-TPCNN and random forests for brain tumor segmentation in MRI	Yang, T., Song, J., Li, L.	Biocybernetics and Biomedical Engineering	2019						1
75	Stacked sparse autoencoder and softmax classifier framework to classify MRI of brain tumor images	Aldhahab, A., Ibrahim, S., Mikhael, W.B.	International Journal of Intelligent Engineering and Systems	2020							1
76	Effective Brain Tumor Classification on MRI Using Deep Belief-convolutional Neural Network with Pixel Change Detection based on Pixel Mapping Technique	Shiny, K.V., Sugitha, N.	Webology	2021								1
77	Brain Tumor Segmentation Using Deep Learning and Fuzzy K-Means Clustering for Magnetic Resonance Images	Pitchai, R., Supraja, P., Victoria, A.H., Madhavi, M.	Neural Processing Letters	2021		1
78	BrainMRNet: Brain tumor detection using magnetic resonance images with a novel convolutional neural network model.	Toğaçar M, Ergen B, Cömert Z.	Med Hypotheses.	2020			1
79	Intelligent glioma grading based on deep transfer learning of MRI radiomic features	Lo, C.-M., Chen, Y.-C., Weng, R.-C., Hsieh, K.L.-C.	Applied Sciences (Switzerland)	2019	1
80	A Robust and Novel Approach for Brain Tumor Classification Using Convolutional Neural Network	Tazin, T., Sarker, S., Gupta, P., (...), Idris, S.A., Alshazly, H.	Computational Intelligence and Neuroscience	2021			1
81	Medical image classification using artificial neural network and spider monkey optimization: An empirical analysis	Pati, S.P., Mishra, D.	Indian Journal of Public Health Research and Development	2018							1
82	Brain tumor detection and classification on mr images by a deep wavelet auto‐encoder model	Kader, I.A.E., Xu, G., Shuai, Z., (...), Ahmad, I.S., Kamhi, S.	Diagnostics	2021							1
83	Brain tumor image classification using convolutional neural networks	Mohammed, M., Nalluru, S.S., Tadi, S., Samineni, R.	International Journal of Advanced Science and Technology	2019				1
84	A Survey of Brain Tumor Segmentation and Classification Algorithms.	Biratu ES, Schwenker F, Ayano YM, Debelee TG.	J Imaging.	2021			1
85	Brain tumor detection from MRI images using histon based segmentation and modified neural network	Sheejakumari, V., Gomathi, S.	Biomedical Research (India)	2016		1
86	Brain tumour classification using siamese neural network and neighbourhood analysis in embedded feature space	Deepak, S., Ameer, P.M.	International Journal of Imaging Systems and Technology	2021							1
87	Fully automatic model-based segmentation and classification approach for MRI brain tumor using artificial neural networks	Arunkumar, N., Mohammed, M.A., Mostafa, S.A., (...), Rodrigues, J.J.P.C., de Albuquerque, V.H.C.	Concurrency and Computation: Practice and Experience	2020							1
88	An improved classification system for brain tumours using wavelet transform and neural network	Dhas, A.S., Madheswaran, M.	West Indian Medical Journal	2018							1
89	An efficient image analysis framework for the classification of glioma brain images using CNN approach	Samikannu, R., Ravi, R., Murugan, S., Diarra, B.	Computers, Materials and Continua	2020						1
90	Combining wavelet statistical texture and recurrent neural network for tumour detection and classification over MRI	Begum, S.S., Rajya Lakshmi, D.	International Journal of Engineering and Advanced Technology	2019							1
91	Differentiation of Glioma Mimicking Encephalitis and Encephalitis Using Multiparametric MR-Based Deep Learning.	Wu W, Li J, Ye J, Wang Q, Zhang W, Xu S.	Front Oncol.	2021			1
92	Brain Tumor Classification Based on Fine-Tuned Models and the Ensemble Method	Noreen, N., Palaniappan, S., Qayyum, A., Ahmad, I., Alassafi, M.O.	Computers, Materials and Continua	2021	1
93	Machine learning methods for the classification of gliomas: initial results using features extracted from MR spectroscopy	Ranjith, G., Parvathy, R., Vikas, V., Chandrasekharan, K., Nair, S.	Neuroradiology Journal	2015			1
94	Identification and classification of brain tumor through mixture model based on magnetic resonance imaging segmentation and artificial neural network	Deepa, A.R., Sam Emmanuel, W.R.M.	Concepts in Magnetic Resonance Part A: Bridging Education and Research	2016							1
95	An Automatic Deep Learning–Based Workflow for Glioblastoma Survival Prediction Using Preoperative Multimodal MR Images: A Feasibility Study	Fu, J., Singhrao, K., Zhong, X., (...), Ruan, D., Lewis, J.H.	Advances in Radiation Oncology	2021		1
96	A review on traditional machine learning and deep learning models for WBCs classification in blood smear images	Khan, S., Sajjad, M., Hussain, T., Ullah, A., Imran, A.S.	IEEE Access	2021		1
97	Classification of brain tumors using convolutional neural network over various SVM methods	Sajja, V.R., Kalluri, H.K.	Ingenierie des Systemes d'Information	2020	1
98	Brain tumor segmentation using K-means clustering and deep learning with synthetic data augmentation for classification.	Khan AR, Khan S, Harouni M, Abbasi R, Iqbal S, Mehmood Z.	Microsc Res Tech.	2021			1
99	Segmentation of brain magnetic resonance images using deep learning classification and multi-modal composition	Kala, R., Deepa, P.	Current Signal Transduction Therapy	2020		1
100	A Deep Learning Model Based on Concatenation Approach for the Diagnosis of Brain Tumor	Noreen, N., Palaniappan, S., Qayyum, A., (...), Imran, M., Shoaib, M.	IEEE Access	2020	1
101	Deep Learning Methodology for Differentiating Glioma Recurrence From Radiation Necrosis Using Multimodal Magnetic Resonance Imaging: Algorithm Development and Validation.	Gao Y, Xiao X, Han B, Li G, Ning X, Wang D, Cai W, Kikinis R, Berkovsky S, Di Ieva A, Zhang L, Ji N, Liu S.	JMIR Med Inform.	2020			1
102	Brain tumor detection from MRI using adaptive thresholding and histogram based techniques	Murali, E., Meena, K.	Scalable Computing	2020		1
103	Combining optimal wavelet statistical texture and recurrent neural network for tumour detection and classification over MRI	Begum, S.S., Lakshmi, D.R.	Multimedia Tools and Applications	2020							1
104	Diagnosis and classification of brain tumor	Singh, R., Prakash, N.	International Journal of Engineering and Advanced Technology	2019							1
105	Deep learning based brain tumor classification and detection system	Ari, A., Hanbay, D.	Turkish Journal of Electrical Engineering and Computer Sciences	2018						1
106	VGG-SCNet: A VGG Net based Deep Learning framework for Brain Tumor Detection on MRI Images	Majib, M.S., Rahman, M.M., Shahriar Sazzad, T.M., Khan, N.I., Dey, S.K.	IEEE Access	2021	1
107	Brain tumour segmentation based on SFCM using back propagation neural network	Swetha, P., Mohanram, S.	International Journal of Innovative Technology and Exploring Engineering	2019		1
108	A framework for brain tumor segmentation and classification using deep learning algorithm	Kulkarni, S.M., Sundari, G.	International Journal of Advanced Computer Science and Applications	2020								1
109	A Novel Method for Classifying Liver and Brain Tumors Using Convolutional Neural Networks, Discrete Wavelet Transform and Long Short-Term Memory Networks.	Kutlu H, Avcı E.	Sensors (Basel).	2019			1
110	Image based group classifier for brain tumor detection using machine learning technique	Krishnaveni, P.R., Kishore, G.N.	Traitement du Signal	2020								1
111	Segmentation of brain tumors from MRI images using convolutional autoencoder	Badža, M.M., Barjaktarović, M.Č.	Applied Sciences (Switzerland)	2021		1
112	Multilevel thresholding and fractal analysis based approach for classification of brain MRI images into tumour and non-tumour	Anami, B.S., Unki, P.H.	International Journal of Medical Engineering and Informatics	2016							1
113	Brain segmentation using deep neural networks	Mohindru, V., Sharma, A., Mathur, A., Gupta, A.K.	International Journal of Sensors, Wireless Communications and Control	2021		1
114	Computer aided diagnosis of brain tumour deep learning convolution neutral network for medical image recognition | [Компютърна диагностика на мозъчен тумор Дълбоко обучение Неволюлна мрежа за медицинско разпознаване на образи]	Habiba, A.A., Raghu, B.	Rentgenologiya i Radiologiya	2020				1
115	Model for Enhancement and Segmentation of Magnetic Resonance Images for Brain Tumor Classification	Chikhalikar, A.M., Dharwadkar, N.V.	Pattern Recognition and Image Analysis	2021	1
116	Robust deep learning classification of adamantinomatous craniopharyngioma from limited preoperative radiographic images.	Prince EW, Whelan R, Mirsky DM, Stence N, Staulcup S, Klimo P, Anderson RCE, Niazi TN, Grant G, Souweidane M, Johnston JM	Sci Rep.	2020			1
117	An expert system for brain tumor detection: Fuzzy C-means with super resolution and convolutional neural network with extreme learning machine.	Özyurt F, Sert E, Avcı D.	Med Hypotheses.	2020			1
118	Deep Learning-Based Magnetic Resonance Imaging Image Feature Analysis for Pathological Classification of Brain Glioma	Yao, W., Thomas, S.	Scientific Programming	2021								1
119	Comparative analysis of classifier performance on MR brain images	Akila, T., UmaMaheswari, P.	International Arab Journal of Information Technology	2015							1
120	Explainable Artificial Intelligence for Human-Machine Interaction in Brain Tumor Localization.	Esmaeili M, Vettukattil R, Banitalebi H, Krogh NR, Geitung JT.	J Pers Med.	2021			1
121	Image-based Classification of Tumor Type and Growth Rate using Machine Learning: a preclinical study.	Tang TT, Zawaski JA, Francis KN, Qutub AA, Gaber MW.	Sci Rep.	2019			1
122	Exponential cuckoo search algorithm to Radial Basis Neural Network for automatic classification in MRI images	Sathish, P., Elango, N.M.	Computer Methods in Biomechanics and Biomedical Engineering: Imaging and Visualization	2019							1
123	Brain tumor classification using Convolutional Neural Networks	Seetha, J., Raja, S.S.	Biomedical and Pharmacology Journal	2018	1
124	Automated Detection of Brain Tumor through Magnetic Resonance Images Using Convolutional Neural Network.	Gull S, Akbar S, Khan HU.	Biomed Res Int.	2021			1
125	Chaotic Harris Hawks Optimization with Quasi-Reflection-Based Learning: An Application to Enhance CNN Design.	Basha J, Bacanin N, Vukobrat N, Zivkovic M, Venkatachalam K, Hubálovský S, Trojovský P.	Sensors (Basel).	2021			1
126	2D MRI image analysis and brain tumor detection using deep learning CNN model LeU-Net	Rai, H.M., Chatterjee, K.	Multimedia Tools and Applications		1
127	Differentiating brain metastases from different pathological types of lung cancers using texture analysis of T1 postcontrast MR	Li, Z., Mao, Y., Li, H., (...), Wan, H., Li, B.	Magnetic Resonance in Medicine	2016		1
128	U-Net Model-Based Classification and Description of Brain Tumor in MRI Images	Tunga, P.P., Singh, V., Aditya, V.S., Subramanya, N.	International Journal of Image and Graphics	2021		1
129	Combining Deep and Handcrafted Image Features for MRI Brain Scan Classification	Hasan, A.M., Jalab, H.A., Meziane, F., Kahtan, H., Al-Ahmad, A.S.	IEEE Access	2019						1
130	A new approach for brain tumor diagnosis system: Single image super resolution based maximum fuzzy entropy segmentation and convolutional neural network.	Sert E, Özyurt F, Doğantekin A.	Med Hypotheses.	2019			1
131	Neural network with bee colony optimization for MRI brain cancer image classification	Subramaniam, S., Radhakrishnan, M.	International Arab Journal of Information Technology	2016							1
132	Fusion of contourlet transform and zernike moments using content based image retrieval for MRI brain tumor images	Anbarasa Pandian, A., Balasubramanian, R.	Indian J. Sci. Technol	2016							1
133	A new intelligent system for diagnosing tumors with MR images using type-2 fuzzy neural network (T2FNN)	Rezaie, V., Parnianifard, A.	Multimedia Tools and Applications	2021							1
134	Computerized grading of brain tumors supplemented by artificial intelligence	Aruna, S.K., Sindhanaiselvan, K., Madhusudhanan, B.	Soft Computing	2020						1
135	Automatic brain tumour diagnostic method based on a back propagation neural network and an extended set-membership filter	Guoli Song, Tian Shan, Min Bao, Yunhui Liu, Yiwen Zhao, Baoshi Chen	Computer Methods and Programs in Biomedicine	2021							1
136	Severity Level Classification of Brain Tumor based on MRI Images using Fractional-Chicken Swarm Optimization Algorithm	Cristin, D.R., Kumar, D.K.S., Anbhazhagan, D.P.	Computer Journal	2021							1
137	Segmenting and Classifying MRI Multimodal Images Using Cuckoo Search Optimization and KNN Classifier	Sumathi, R., Venkatesulu, M., Arjunan, S.P.	IETE Journal of Research	2021						1
138	A Survey and Analysis on Automated Glioma Brain Tumor Segmentation and Overall Patient Survival Prediction	Agravat, R.R., Raval, M.S.	Archives of Computational Methods in Engineering	2021		1
139	Convolutional Neural Network Based on Complex Networks for Brain Tumor Image Classification with a Modified Activation Function	Huang, Z., Du, X., Chen, L., (...), Chou, Y., Jin, L.	IEEE Access	2020								1
140	Image analysis for MRI based brain tumour detection using hybrid segmentation and deep learning classification technique	Rao, S.K.V., Lingappa, B.	International Journal of Intelligent Engineering and Systems	2019								1
141	Brain Tumor MR Image Classification Using Convolutional Dictionary Learning With Local Constraint.	Gu X, Shen Z, Xue J, Fan Y, Ni T.	Front Neurosci.	2021			1
142	Combining noise-to-image and image-to-image GANs: Brain MR image augmentation for tumor detection	Han, C., Rundo, L., Araki, R., (...), Nakayama, H., Hayashi, H.	IEEE Access	2019							1
143	A Glioma Detection and Segmentation Method in MR Imaging | [一种在MR图像中进行脑胶质瘤检测和病灶分割的方法]	Chen, H., Li, G., Liu, Y., Qiang, Y.	Dianzi Yu Xinxi Xuebao/Journal of Electronics and Information Technology	2021		1
144	Brain tumor detection and classification using convolution neural network	Manjunath, S., Sanjay Pande, M.B., Raveesh, B.N., Madhusudhan, G.K.	International Journal of Recent Technology and Engineering	2019									1
145	DiaMe: IoMT deep predictive model based on threshold aware region growing technique	Abbas, S., Mahmoud, A.M.	International Journal of Electrical and Computer Engineering	2021	1
146	DC-AL GAN: Pseudoprogression and true tumor progression of glioblastoma multiform image classification based on DCGAN and AlexNet.	Li M, Tang H, Chan MD, Zhou X, Qian X.	Med Phys.	2020			1
147	A survey on brain tumor detection based on structural MRI using machine learning and deep learning techniques	Joshi, D., Channe, H.	International Journal of Scientific and Technology Research	2020		1
148	Prediction of IDH and TERT promoter mutations in low-grade glioma from magnetic resonance images using a convolutional neural network.	Fukuma R, Yanagisawa T, Kinoshita M, Shinozaki T, Arita H, Kawaguchi A.	Sci Rep.	2019			1
149	Identification and classification of brain tumor MRI images with feature extraction using DWT and probabilistic neural network.	Varuna Shree N, Kumar TNR.	Brain Inform.	2018			1
150	Multi-class brain tumor classification using residual network and global average pooling	Kumar, R.L., Kakarla, J., Isunuri, B.V., Singh, M.	Multimedia Tools and Applications	2021	1
151	Classification of brain tumors from mri images using a convolutional neural network	Badža, M.M., Barjaktarović, M.C.	Applied Sciences (Switzerland)	2020	1
152	Brain tumor segmentation using cluster ensemble and deep super learner for classification of MRI	Ramya, P., Thanabal, M.S., Dharmaraja, C.	Journal of Ambient Intelligence and Humanized Computing	2021		1
153	BAT Algorithm with fuzzy C-Ordered Means (BAFCOM) clustering segmentation and Enhanced Capsule Networks (ECN) for brain cancer MRI images classification	Alhassan, A.M., Wan Zainon, W.M.N.	IEEE Access	2020							1
154	Computer-aided detection of brain tumor from magnetic resonance images using deep learning network	Chanu, M.M., Thongam, K.	Journal of Ambient Intelligence and Humanized Computing	2020		1
155	Domain Mapping and Deep Learning from Multiple MRI Clinical Datasets for Prediction of Molecular Subtypes in Low Grade Gliomas.	Ali MB, Gu IY, Berger MS, Pallud J, Southwell D, Widhalm G, Roux A, Vecchio TG, Jakola AS.	Brain Sci.	2020			1
156	A framework combining DNN and level-set method to segment brain tumor in multi-modalities MR image	Qin, P., Zhang, J., Zeng, J., Liu, H., Cui, Y.	Soft Computing	2019		1
157	Transfer learning networks with skip connections for classification of brain tumors	Alaraimi, S., Okedu, K.E., Tianfield, H., Holden, R., Uthmani, O.	International Journal of Imaging Systems and Technology	2021	1
158	Explainable machine learning framework for image classification problems: Case study on glioma cancer prediction	Pintelas, E., Liaskos, M., Livieris, I.E., Kotsiantis, S., Pintelas, P.	Journal of Imaging	2020			1
159	AUTOMATION of MR BRAIN IMAGE CLASSIFICATION for MALIGNANCY DETECTION	Ahammed Muneer, K.V., Paul Joseph, K.	Journal of Mechanics in Medicine and Biology	2019							1
160	CapsNet topology to classify tumours from brain images and comparative evaluation	Goceri, E.	IET Image Processing	2020							1
161	Brain tumor classification using a hybrid deep autoencoder with Bayesian fuzzy clustering-based segmentation approach	Raja, P.M.S., Viswasa, A.,	Integr. Med. Res	2021							1
162	Deep learning techniques for classification of brain MRI	Wahlang, I., Sharma, P., Sanyal, S., Saha, G., Maji, A.K.	International Journal of Intelligent Systems Technologies and Applications	2020	1
163	A hybrid framework for brain tumor detection and classification using neural network	Shijin Kumar, P.S., Sudhan, M.B.	ARPN Journal of Engineering and Applied Sciences	2018							1
164	Differentiating Small-Cell Lung Cancer From Non-Small-Cell Lung Cancer Brain Metastases Based on MRI Using Efficientnet and Transfer Learning Approach	Grossman, R., Haim, O., Abramov, S., Shofty, B., Artzi, M.	Technology in cancer research & treatment	2021		1
165	Hierarchical-order multimodal interaction fusion network for grading gliomas.	He M, Han K, Zhang Y, Chen W.	Phys Med Biol.	2021			1
166	Classification on magnetic resonance imaging (Mri) brain tumour using BPNN, SVM and CNN	Ahmad, F.	International Journal of Recent Technology and Engineering	2019	1
167	Brain tumor detection: a long short-term memory (LSTM)-based learning model	Amin, J., Sharif, M., Raza, M., (...), Sial, R., Shad, S.A.	Neural Computing and Applications	2020							1
168	Combining tissue segmentation and neural network for brain tumor detection	Damodharan, S., Raghavan, D.	International Arab Journal of Information Technology	2015		1
169	A Multiparametric MRI-Based Radiomics Analysis to Efficiently Classify Tumor Subregions of Glioblastoma: A Pilot Study in Machine Learning.	Chiu FY, Le NQK, Chen CY.	J Clin Med.	2021			1
170	Brain Tumor Classification Using Enhanced Statistical Texture Features	Mudda, M., Manjunath, R., Krishnamurthy, N.	IETE Journal of Research	2020							1
171	Automated brain tumor detection and classification using weighted fuzzy clustering algorithm, deep auto encoder with barnacle mating algorithm and random forest classifier techniques	Anantharajan, S., Gunasekaran, S.	International Journal of Imaging Systems and Technology	2021						1
172	Brain tumour classification using two-tier classifier with adaptive segmentation technique	Anitha, V., Murugavalli, S.	IET Computer Vision	2016		1
173	Safe engineering application for brain tumor classification using deep learning advance methods	Abdulsadda, A.T., Al-Shoukry, S.	Journal of Green Engineering	2020		1
174	Early brain tumour prediction using an enhancement feature extraction technique and deep neural networks	Somasundaram, S., Gobinath, R.	International Journal of Innovative Technology and Exploring Engineering	2019								1
175	Brain tumour detection and classification using hybrid neural network classifier	Nayak, K., Supreetha, B.S., Benachour, P., Nayak, V.	International Journal of Biomedical Engineering and Technology	2021							1
176	Brain Tumor Classification for MR Images using Convolution Neural Network with Global Average Pooling	Nayak, M.M., Anjanappa, S.D.K.	International Journal of Intelligent Engineering and Systems	2021								1
177	Ensemble learning of multiview CNN models for survival time prediction of brain tumor patients using multimodal MRI scans	Mossa, A.A., Çevik, U.	Turkish Journal of Electrical Engineering and Computer Sciences	2021		1
178	A computer-aided diagnosis system for brain magnetic resonance imaging images using a novel differential feature neural network.	Huang Z, Xu H, Su S, Wang T, Luo Y, Zhao X, Liu Y, Song G, Zhao Y.	Comput Biol Med.	2020			1
179	A Computer-Based Brain Tumor Detection Approach with Advanced Image Processing and Probabilistic Neural Network Methods	Ural, B.	Journal of Medical and Biological Engineering	2018		1
180	Clustering of Brain Tumors in Brain MRI Images Based on Extraction of Textural and Statistical Features	Goushchi, H.S., Pourasad, Y.	International journal of online and biomedical engineering	2020							1
181	A Two-Stage Coarse-to-Fine Brain Tumor Segmentation Framework | [一种两阶段的由粗到细的多模态脑肿瘤分割框架]	Chen, H., Qin, Z.-G., Ding, Y.	Dianzi Keji Daxue Xuebao/Journal of the University of Electronic Science and Technology of China	2020		1
182	Adaptive multi-modality fusion network for glioma grading | [自适应多模态特征融合胶质瘤分级网络]	Wang, L., Cao, Y., Tian, L., (...), Zhang, J., Wang, L.	Journal of Image and Graphics	2021					1
183	Bilateral filtering allied with neural network based on glszm characteristic mining and typical classification of human brain images	Hariharasudhan, S., Raghu, B.	International Journal of Recent Technology and Engineering	2019		1
184	Ensemble classification and segmentation for intracranial metastatic tumors on MRI images based on 2D U-nets	Li, C.-C., Wu, M.-Y., Sun, Y.-C., (...), Guo, W.-Y., Lu, H.H.-S.	Scientific Reports	2021		1
185	Glioma-Specific Diffusion Signature in Diffusion Kurtosis Imaging.	Hempel JM, Brendle C, Adib SD, Behling F, Tabatabai G, Castaneda Vega S, Schittenhelm J, Ernemann U, Klose U.	J Clin Med.	2021			1
186	An automated brain tumour boundary detection using region based segmentation technique along with SVM classifier	Dharnia, S., Wasson, V.	International Journal of Engineering and Advanced Technology	2019		1
187	Developing a deep learning model involving CNN and LSTM for processing medical images	Rukmani Devi, S., Selvaraju, P.	Journal of Advanced Research in Dynamical and Control Systems	2019				1
188	Brain tumor segmentation and classification from magnetic resonance images: Review of selected methods from 2014 to 2019	Arti Tiwari, Shilpa Srivastava, Millie Pant	Pattern Recognition Letters	2019		1
189	Brain tumor detection and classification using deep learning classifier on MRI images	Gladis Pushpa Rathi, V.P., Palani, S.	Research Journal of Applied Sciences, Engineering and Technology	2015						1
190	Deep learning with mixed supervision for brain tumor segmentation.	Mlynarski P, Delingette H, Criminisi A, Ayache N.	J Med Imaging (Bellingham).	2019			1
191	Efficient tumour detection from brain MR image with morphological processing and classification using unified algorithm	Sethuram Rao, G., Vydeki, D.	International Journal of Medical Engineering and Informatics	2021				1
192	A novel textural pixel connectivity (TPC) based MRI brain image segmentation technique	Gopinath, S., Somasundareswari, D.	Current Medical Imaging Reviews	2017		1
193	A novel textural pixel connectivity (TPC) based MRI brain image segmentation technique segmentation technique	Gopinath, S., Somasundareswari, D.	Current Medical Imaging Reviews	2016		1
194	3D brain tumor image segmentation integrating cascaded anisotropic fully convolutional neural network and hybrid level set method	Zhao, L., Li, Q., Wang, C.-H., Liao, Y.-C.	Journal of Imaging Science and Technology	2020		1
195	Brain tumor detection based on features extracted and classified using a low-complexity neural network	Papageorgiou, V.	Traitement du Signal	2021	1
196	A Novel Approach to Improving Brain Image Classification Using Mutual Information-Accelerated Singular Value Decomposition	Al-Saffar, Z.A., Yildirim, T.	IEEE Access	2020							1
197	A new method for brain tumor detection using the bhattacharyya similarity coefficient, color conversions and neural network	Mansori, B., Pilevar, A.H., Azadnia, B.	Tehran University Medical Journal	2015		1
198	A mathematical theory of shape and neuro-fuzzy methodology-based diagnostic analysis: a comparative study on early detection and treatment planning of brain cancer.	Kar S, Majumder DD.	Int J Clin Oncol.	2017			1
199	Multi-branch Residual Network Applied to Predict the Three-Year Survival of Patients with Glioblastoma	Fu, X., Chen, C., Li, D.	Journal of Medical and Biological Engineering	2020		1
200	Multimodal MRI synthesis using unified generative adversarial networks.	Dai X, Lei Y, Fu Y, Curran WJ, Liu T, Mao H, Yang X.	Med Phys.	2020			1
201	A fuzzy logic-based meningioma tumor detection in magnetic resonance brain images using CANFIS and U-Net CNN classification	Ragupathy, B., Karunakaran, M.	International Journal of Imaging Systems and Technology	2021		1
202	Efficient brain tumor detection and classification using magnetic resonance imaging.	Sundarasekar R, Appathurai A.	Biomed Phys Eng Express.	2021			1
203	Gaussian hybrid fuzzy clustering and radial basis neural network for automatic brain tumor classification in MRI images	Sathish, P., Elango, N.M.	Evolutionary Intelligence	2020							1
204	Automated brain image classification using neural network approach and abnormality analysis	Muthu Krishnammal, P., Selvakumar Raja, S.	International Journal of Engineering and Technology	2015							1
205	Multiparametric MRI Features Predict the SYP Gene Expression in Low-Grade Glioma Patients: A Machine Learning-Based Radiomics Analysis.	Xiao Z, Yao S, Wang ZM, Zhu DM, Bie YN, Zhang SZ, Chen WL.	Front Oncol.	2021			1
206	Three-dimensional textural features of conventional MRI improve diagnostic classification of childhood brain tumours.	Fetit AE, Novak J, Peet AC, Arvanitits TN.	NMR Biomed.	2015			1
207	Automated brain tumor segmentation on multi-modal MR image using SegNet	Alqazzaz, S., Sun, X., Yang, X., Nokes, L.	Computational Visual Media	2019		1
208	A comprehensive review on brain tumor segmentation and classification of MRI images	Rao, C.S., Karunakara, K.	Multimedia Tools and Applications	2021		1
209	Integration of optimized neural network and convolutional neural network for automated brain tumor detection	Thangarajan, S.K., Chokkalingam, A.	Sensor Review	2021								1
210	Classification of Pediatric Posterior Fossa Tumors Using Convolutional Neural Network and Tabular Data	Artzi, M., Redmard, E., Tzemach, O., (...), Constantini, S., Ben-Sira, L.	IEEE Access	2021	1
211	An efficient wavelet-based image fusion for brain tumor detection and segmentation over PET and MRI image	Preethi, S., Aishwarya, P.	Multimedia Tools and Applications	2021		1
212	A novel fully automated MRI-based deep-learning method for classification of IDH mutation status in brain gliomas.	Bangalore Yogananda CG, Shah BR, Vejdani-Jahromi M, Nalawade SS, Murugesan GK, Yu FF, Pinho MC, Wagner BC, Mickey B, Patel TR, Fei B, Madhuranthakam AJ, Maldjian JA.	Neuro Oncol.	2020			1
213	Transfer learning approach for classification of histopathology whole slide images	Ahmed, S., Shaikh, A., Alshahrani, H., (...), Baber, J., Bakhtyar, M.	Sensors	2021		1
214	The diagnostic value of quantitative texture analysis of conventional MRI sequences using artificial neural networks in grading gliomas	D. Alis, O. Bagcilar, Y.D. Senli, C. Isler, M. Yergin, N. Kocer, C. Islak, O. Kizilkilic,	Clinical Radiology	2020		1
215	Brain tumor classification in MR images based on multi-modal texture features and kernel based support vector machine	Kharmega Sundararaj, G., Jayachandran, A.	International Journal of Applied Engineering Research	2015						1
216	Classification of glioblastoma versus primary central nervous system lymphoma using convolutional neural networks.	McAvoy M, Prieto PC, Kaczmarzyk JR, Fernández IS, McNulty J, Smith T, Yu KH, Gormley WB, Arnaout O.	Sci Rep.	2021			1
217	Prediction of 1p/19q Codeletion in Diffuse Glioma Patients Using Pre-operative Multiparametric Magnetic Resonance Imaging.	Kim D, Wang N, Ravikumar V, Raghuram DR, Li J, Patel A, Wendt RE 3rd, Rao G, Rao A.	Front Comput Neurosci.	2019			1
218	Cascading handcrafted features and Convolutional Neural Network for IoT-enabled brain tumor segmentation	Hikmat Khan, Pir Masoom Shah, Munam Ali Shah, Saif ul Islam, Joel J.P.C. Rodrigues	Computer Communications	2020		1
219	A pervasive health care device computing application for brain tumors with machine and deep learning techniques	Sreelakshmi, D., Inthiyaz, S.	International Journal of Pervasive Computing and Communications	2021		1
220	Classification of magnetic resonance images for brain tumour detection	Kurmi, Y., Chaurasia, V.	IET Image Processing	2020						1
221	Optimal brain tumor diagnosis based on deep learning and balanced sparrow search algorithm	Liu, T., Yuan, Z., Wu, L., Badami, B.	International Journal of Imaging Systems and Technology	2021								1
222	Brain tumor automatic segmentation using fully convolutional networks	Cui, S., Mao, L., Xiong, S.	Journal of Medical Imaging and Health Informatics	2017		1
223	Dimensionality reduction of brain tumors and classification using hybrid ensemble classifier	Vijay Kumar, B., Kumar, P.	Journal of Advanced Research in Dynamical and Control Systems	2019							1
224	MASCA–PSO based LLRBFNN model and improved fast and robust FCM algorithm for detection and classification of brain tumor from MR image	Mishra, S., Sahu, P., Senapati, M.R.	Evolutionary Intelligence	2019							1
225	Brain tumor segmentation from 3D brain MRI using 3D convolutional neural network	Patel, H., Parikh, M.C., Pipalia, M.	International Journal of Innovative Technology and Exploring Engineering	2019		1
226	A non-invasive methodology for the grade identification of astrocytoma using image processing and artificial intelligence techniques	Subashini, M.M., Sahoo, S.K., Sunil, V., Easwaran, S.	Expert Systems with Applications	2016						1
227	A hybrid feature selection-based approach for brain tumor detection and automatic segmentation on multiparametric magnetic resonance images.	Chen H, Ban D, Qi XS, Pan X, Qiang Y, Yang Q.	Med Phys.	2021			1
228	Observing deep radiomics for the classification of glioma grades.	Kobayashi K, Miyake M, Takahashi M, Hamamoto R.	Sci Rep.	2021			1
229	AI-powered radiomics algorithm based on slice pooling for the glioma grading	Zhao, G., Man, P., Bai, J., (...), Lin, Y., Cheng, J.	IEEE Transactions on Industrial Informatics	2021						1
230	A hybrid feature selection-based brain tumor detection and segmentation in multiparametric magnetic resonance imaging.	Chen H, Ban D, Qi XS, Pan X, Qiang Y, Yang Q.	Med Phys.	2021			1
231	An efficient skull stripping algorithm using connected regions and morphological operation	Shijin Kumar, P.S., Dharun, V.S.	ARPN Journal of Engineering and Applied Sciences	2016		1
232	Segmentation and classification of brain tumors using modified median noise filter and deep learning approaches	Ramesh, S., Sasikala, S., Paramanandham, N.	Multimedia Tools and Applications	2021		1
233	MRI-Based Deep-Learning Method for Determining Glioma MGMT Promoter Methylation Status.	Yogananda CGB, Shah BR, Nalawade SS, Murugesan GK, Yu FF, Pinho MC, Wagner BC, Mickey B, Patel TR, Fei B, Madhuranthakam AJ, Maldjian JA.	AJNR Am J Neuroradiol.	2021			1
234	Analyzing MRI scans to detect glioblastoma tumor using hybrid deep belief networks	Reddy, A.V.N., Krishna, C.P., Mallick, P.K., (...), Zymbler, M., Kumar, S.	Journal of Big Data	2020							1
235	BMRI TISEHHT: Brain MRI image segment based on enhanced Hilbert Huang transform	Vijayalakshmi, S., Padma, S.	International Journal of Applied Engineering Research	2015		1
236	Medical image segmentation using fast discrete curvelet transform and classification methods for MRI brain images	Krishnammal, P.M., Raja, S.S.	Multimedia Tools and Applications	2020							1
237	UNet-VGG16 with transfer learning for MRI-based brain tumor segmentation	Pravitasari, A.A., Iriawan, N., Almuhayar, M., (...), Purnami, S.W., Ferriastuti, W.	Telkomnika (Telecommunication Computing Electronics and Control)	2020		1
238	Brain tumour segmentation and detection using modified region growing and genetic algorithm in MRI images	Kavitha, A.R., Chellamuthu, C.	International Journal of Medical Engineering and Informatics	2017		1
239	Discrete wavelet transmission and modified PSO with ACO based feed forward neural network model for brain tumour detection	Jayalakshmi, M., Nagaraja Rao, S.	Computers, Materials and Continua	2020							1
240	Assessing Versatile Machine Learning Models for Glioma Radiogenomic Studies across Hospitals.	Kawaguchi RK, Takahashi M, Miyake M, Kinoshita M, Takahashi S, Ichimura K, Hamamoto R, Narita Y, Sese J.	Cancers (Basel).	2021			1
241	Brain tumor segmentation using DE embedded OTSU method and neural network	Sharma, A., Kumar, S., Singh, S.N.	Multidimensional Systems and Signal Processing	2019		1
242	Brain tumor segmentation using 3D Mask R-CNN for dynamic susceptibility contrast enhanced perfusion imaging.	Jeong J, Lei Y, Kahn S, Liu T, Curran WJ, Shu HK, Mao H, Yang X.	Phys Med Biol.	2020			1
243	Evaluation of magnetic resonance image segmentation in brain low-grade gliomas using support vector machine and convolutional neural network.	Yang Q, Zhang H, Xia J, Zhang X.	Quant Imaging Med Surg.	2021			1
244	Automatic classification of brain MRI images using SVM and neural network classifiers	Natteshan, N.V.S., Jothi, J.A.A.	Advances in Intelligent Systems and Computing	2015							1
245	PBTNet: A New Computer-Aided Diagnosis System for Detecting Primary Brain Tumors	Lu, S.-Y., Satapathy, S.C., Wang, S.-H., Zhang, Y.-D.	Frontiers in Cell and Developmental Biology	2021							1
246	State-of-the-Art CNN Optimizer for Brain Tumor Segmentation in Magnetic Resonance Images.	Yaqub M, Jinchao F, Zia MS, Arshid K, Jia K, Rehman ZU, Mehmood A.	Brain Sci.	2020			1
247	Automatic Segmentation Algorithm for Multimodal Magnetic Resonance-Based Brain Tumor Images | [多模态磁共振脑肿瘤图像自动分割算法研究]	He, C., Xu, H., Wang, Z., Ma, L.	Guangxue Xuebao/Acta Optica Sinica	2020					1
248	Diagnosis of brain cancer using radial basis function neural network with singular value decomposition method	Abadi, A.M., Wustqa, D.U., Nurhayadi	International Journal of Machine Learning and Computing	2019							1
249	Evolutionary learning of spiking neural networks towards quantification of 3D MRI brain tumor tissues	Baladhandapani, A., Nachimuthu, D.S.	Soft Computing	2015		1
250	An optimized MRI segmentation of neonatal brain images based on expectation maximization algorithm	Jegadeeswari, M., Kamarajan, M.	International Journal of Applied Engineering Research	2015		1
251	Clustering and neural network approaches for automated segmentation and classification of MRI brain images	Muthukrishnammal, P., Selvakumar Raja, S.	Journal of Theoretical and Applied Information Technology	2015							1
252	A professional analysis and evaluation of computed tomography brain tumor images using SDNN for segmentation and SOM-LS-SVM for classification	Ramakrishnan, T., Sankaragomathi, B.	Journal of Medical Imaging and Health Informatics	2016		1
253	Di-phase midway convolution and deconvolution network for brain tumor segmentation in MRI images	Chithra, P.L., Dheepa, G.	International Journal of Imaging Systems and Technology	2020		1
254	Magnetic resonance imaging study of gray matter in schizophrenia based on xgboost	Yu, W., Na, Z., Fengxia, Y., Yanping, G.	Journal of Integrative Neuroscience	2018		1
255	A Novel Intelligent System for Brain Tumor Diagnosis Based on a Composite Neutrosophic-Slantlet Transform Domain for Statistical Texture Feature Extraction.	Wady SH, Yousif RZ, Hasan HR.	Biomed Res Int.	2020			1
256	Adaptive Augmentation of Medical Data Using Independently Conditional Variational Auto-Encoders	Pesteie, M., Abolmaesumi, P., Rohling, R.N.	IEEE Transactions on Medical Imaging	2019		1
257	A Characterization Approach for the Review of CAD Systems Designed for Breast Tumor Classification Using B-Mode Ultrasound Images	Kriti, Virmani, J., Agarwal, R.	Archives of Computational Methods in Engineering	2021		1
258	Multi-modal brain tumor image segmentation based on SDAE	Ding, Y., Dong, R., Lan, T., (...), Chen, H., Qin, Z.	International Journal of Imaging Systems and Technology	2018		1
259	Data analysis for decomposition and classification of diseased fmri brain images for inter-racial disease types of alzheimer’s vs tumors using sofm and enhancement by lvq neural networks and comparisons with ga and svms	Balaji, R., Manokar, V., Manokar, N.V., Patnaik, L.M.	Journal of Advanced Research in Dynamical and Control Systems	2018							1
260	Non-convex non-local reactive flows for saliency detection and segmentation	Galiano, G., Ramírez, I., Schiavi, E.	Journal of Computational and Applied Mathematics	2020		1
261	Fully automated analysis combining [18F]-FET-PET and multiparametric MRI including DSC perfusion and APTw imaging: a promising tool for objective evaluation of glioma progression	Paprottka, K.J., Kleiner, S., Preibisch, C., (...), Kirschke, J.S., Wiestler, B.	European Journal of Nuclear Medicine and Molecular Imaging	2021		1
262	Detection of Isocitrate Dehydrogenase Mutated Glioblastomas through Anomaly Detection Analytics	Taha, B., Li, T., Boley, D., Chen, C.C., Sun, J.	Neurosurgery	2021		1
263	Survival prediction in glioblastoma on post-contrast magnetic resonance imaging using filtration based first-order texture analysis: Comparison of multiple machine learning models.	Priya S, Agarwal A, Ward C, Locke T, Monga V, Bathla G.	Neuroradiol J.	2021			1
264	A deep semantic segmentation correction network for multi-model tiny lesion areas detection.	Liu Y, Li X, Li T, Li B, Wang Z, Gan J, Wei B.	BMC Med Inform Decis Mak.	2021		1
265	The development of a practical artificial intelligence tool for diagnosing and evaluating autism spectrum disorder: Multicenter study	Chen, T., Chen, Y., Yuan, M., (...), Froehlich, T., Lu, L.	JMIR Medical Informatics	2020		1
